# Supplementary material
Source: MDPI journal article supplement (https://www.mdpi.com/2071-1050/13/4/2418)
Supplement: s1 [file s1]

## Annex 1

| Previous travelling habits | New travelling habits | Assumptions                                                                                                                                                                                                                                                                                                                                                                                                                                                                                                                                                                                                                                                                                                                                   |
|----------------------------|-----------------------|-----------------------------------------------------------------------------------------------------------------------------------------------------------------------------------------------------------------------------------------------------------------------------------------------------------------------------------------------------------------------------------------------------------------------------------------------------------------------------------------------------------------------------------------------------------------------------------------------------------------------------------------------------------------------------------------------------------------------------------------------|
| Car-dependent              | Car-sharing           | <p>Change based on the kilometres travelled by car owners/ Assumption that the individual quits vehicle ownership</p> <p>19.09% Reduction of the annual kilometres travelled when using car-sharing.</p> <p>24.80% of the kilometres are driven by the shared car</p> <p>34.00% of the km done by CS used to be done by private car</p> <p>41.00% of the km done by CS used to be done by train</p> <p>4.00% of the km done by CS used to be done by bus</p> <p>3.00% of the km done by CS used to be done by bike</p> <p>1.00% of the km done by CS used to be done by private car as passenger</p> <p>Trips that wouldn't have been done or trips done as passengers. It does not make sense to assign this % to walking.</p> <p>17.00%</p> |
| Car-free                   | Car-sharing           | <p>Change based on the kilometres travelled by car-free</p> <p>3.72% Increase in the km travelled after joining CS</p>                                                                                                                                                                                                                                                                                                                                                                                                                                                                                                                                                                                                                        |

## Annex 2

### Steps to build the fleets

#### Peer-to-peer vehicles

Empirical data from a peer-to-peer company was used to build average vehicles. Rentals from 2018 were analysed as follows:

1. Identify the most rented vehicle differentiating brand and model for every fuel type
2. Search for official manuals that contain information about tailpipe emissions and fuel consumption of these vehicles. When vehicle manuals were not available we search for information in <https://www.autoverleden.nl/> using the vehicle licenses available in the peer-to-peer database (for fuel consumption urban values were taken)
3. Group vehicles considering their fuel consumption and tailpipe emissions. Build averages of each group (Table S1)
4. For additional passengers in the car an increment of 6% in fuel consumption was modelled.

Table S1-Peer-to-peer average vehicles fuel consumption and tailpipe emissions

| Type of fuel | Group          | Tailpipe emissions           | Fuel consumption |
|--------------|----------------|------------------------------|------------------|
| Petrol       | Small vehicle  | 108 g of CO <sub>2</sub> /km | 0.045 l/km       |
|              | Medium vehicle | 130 g of CO <sub>2</sub> /km | 0.058 l/km       |
|              | Big vehicle    | 225 g of CO <sub>2</sub> /km | 0.094 l/km       |
| Diesel       | Small vehicle  | 140 g of CO <sub>2</sub> /km | 0.058 l/km       |
|              | Big vehicle    | 130 g of CO <sub>2</sub> /km | 0.058 l/km       |
| Electric     | -              | -                            | 0.1945 kWh/km    |

#### Private vehicles

Publicly available data was used to build the private fleet following these steps for fuel consumption and tailpipe emissions for diesel and gasoline (Table S2):

1. Divide in ranges the tailpipe emissions and fuel consumption for every fuel type

2. Identify the percentage of vehicles in each range
3. Group the ranges in three categories to build average vehicles
4. For additional passengers in the car an increment of 6% in fuel consumption was modelled.

In the case of electric vehicles:

1. Identify the model and brand that are dominant in the fleet
2. Search for official manuals that contain the energy consumption per km driven

*Table S2 - Private fleet average vehicles fuel consumption and tailpipe emissions*

| Type of fuel | Group          | Tailpipe emissions           | Fuel consumption |
|--------------|----------------|------------------------------|------------------|
| Petrol       | Small vehicle  | 110 g of CO <sub>2</sub> /km | 0.0412 l/km      |
|              | Medium vehicle | 150 g of CO <sub>2</sub> /km | 0.045 l/km       |
|              | Big vehicle    | 180 g of CO <sub>2</sub> /km | 0.063 l/km       |
| Diesel       | Small vehicle  | 100 g of CO <sub>2</sub> /km | 0.037 l/km       |
|              | Medium vehicle | 120 g of CO <sub>2</sub> /km | 0.041 l/km       |
|              | Big vehicle    | 160 g of CO <sub>2</sub> /km | 0.054 l/km       |
| Electric     |                |                              | 0.127 kWh/km     |

### ***Business-to-consumer***

The average vehicle were assumed to have similar characteristics than the ones that are offered by Green Wheels. For additional passengers in the car an increment of 6% in fuel consumption was modelled.

*Table S3 - Business-to-consumer average vehicles fuel consumption and tailpipe emissions*

| Type of fuel | Group          | Tailpipe emissions           | Fuel consumption |
|--------------|----------------|------------------------------|------------------|
| Petrol       | Small vehicle  | 124 g of CO <sub>2</sub> /km | 0.04 l/km        |
|              | Medium vehicle | 189 g of CO <sub>2</sub> /km | 0.06 l/km        |
| Electric     |                |                              | 0.127 kWh/km     |

### ***Private ebikes***

The average bike was assumed to have the same characteristics as the model Dolce Comfort FDST from stella (Table 4).

*Table 4 - ebike average energy consumption*

| Type of fuel | Fuel consumption |
|--------------|------------------|
| Electric     | 0.035 kWh/km     |

### ***Private motorcycles***

The average motorcycle was assumed to be BMW R 1250 GS Adventure

Table S5 - Motorcycle average fuel consumption and tailpipe emissions

| Type of fuel | Tailpipe emissions           | Fuel consumption |
|--------------|------------------------------|------------------|
| Petrol       | 110 g of CO <sub>2</sub> /km | 0.035 l/km       |

### Public transport

The average bus, metro, train and tram was obtain from the project STRAM personenvervoer 2014. The values are as follows:

Table S6 - Well-to-wheel emissions from public transport source: STREAM project

| Type of fuel | Public transport mode | Well-to-wheel emissions      |
|--------------|-----------------------|------------------------------|
| Petrol       | Bus                   | 124 g of CO <sub>2</sub> /km |
| Petrol       | Tram                  | 76 of CO <sub>2</sub> /km    |
| Petrol       | Metro                 | 83 of CO <sub>2</sub> /km    |
| Petrol       | Train                 | 39 of CO <sub>2</sub> /km    |

### Annex 3

To start we calculate the amount of citizens that belong to certain age group in Amsterdam:

*# of citizen in age group  $x$  = Amsterdam population \* % of NDL population in age group  $x$*

Then these numbers are adjusted to population that can drive (the first age group includes people that cannot have a driving licence). Now we calculate car ownership in Amsterdam:

*Car owners in Amsterdam = # of citizen in age group  $x$  \* Rate of owners within an age group in the NDL*

This value is later adjusted due to a lower rate of ownership in metropolitan areas (these reduction numbers are arbitrary)

The non-owner is the rest of the population that commutes (there is a percentage of the population that doesn't travel because they're sick or old.)
